# Supplementary material
Source: Springer Nature journal article supplement (https://www.springermedizin.de/resource/supplementary/12885_2012_3354_MOESM1_ESM.pdf/9463560)

**Hep2G**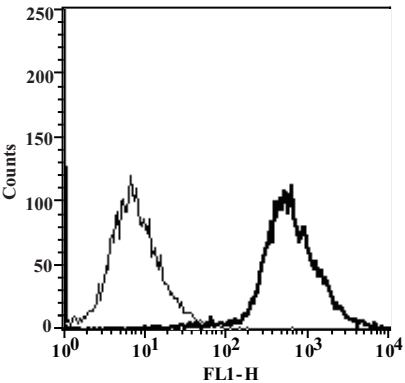**HUH6**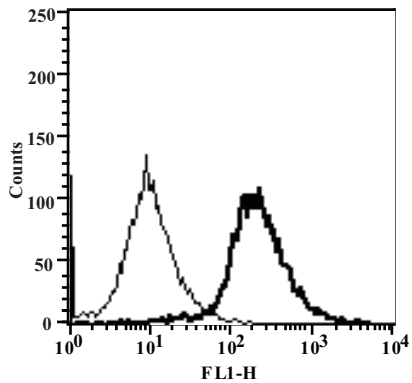**L02**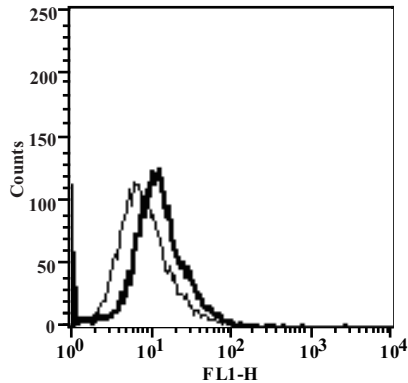

Supplement: MOESM1 [file 9463560]
